# Supplementary material for: A universal strategy to prepare porous graphene films: binder-free anodes for high-rate lithium-ion and sodium-ion batteries
Source: Royal Society of Chemistry journal article supplement (doi:10.1039/c6ta01907b), 2016-01-01
Supplement: c6ta01907b1.pdf [file c6ta01907b1.pdf]

## Supplementary Information

### A universal strategy to prepare porous graphene film: binder-free anode for high-rate lithium-ion and sodium-ion batteries

Xiaoting Zhang, Jisheng Zhou,<sup>\*</sup> Chengcheng Liu, Xiaohong Chen and Huaihe Song<sup>\*</sup>

State Key Laboratory of Chemical Resource Engineering, Beijing Key Laboratory of Electrochemical Process and Technology for Materials, Beijing University of Chemical Technology, Beijing 100029, China.

<sup>\*</sup> E-mail: songhh@mail.buct.edu.cn, zhoujs@mail.buct.edu.cn

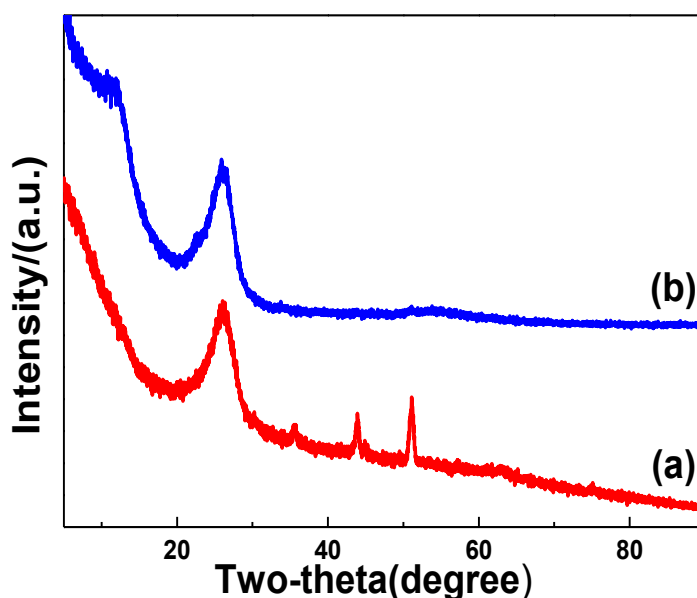

Fig. S1 XRD patterns of (a) PGF/Fe<sub>3</sub>C and (b) PGF-1.

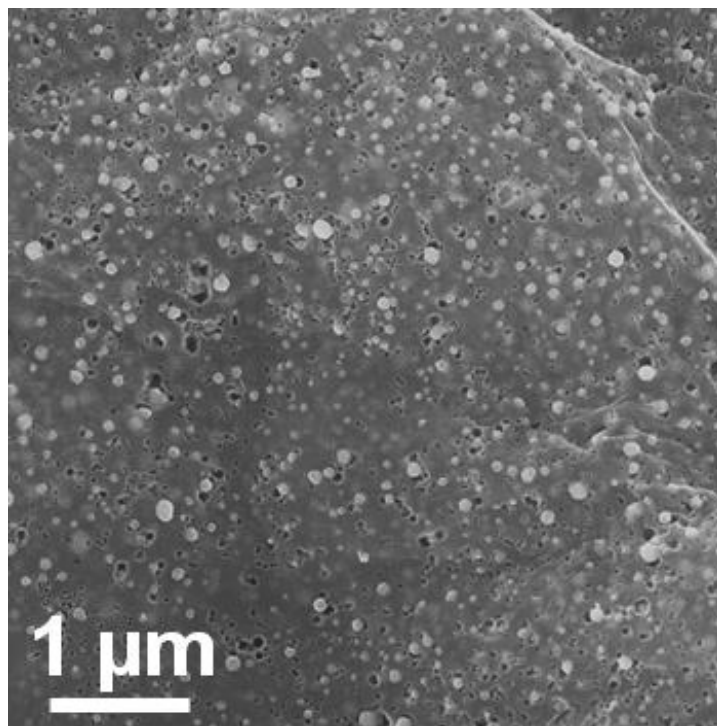

**Fig. S2** SEM image of PGF-1-Fe(NO<sub>3</sub>)<sub>3</sub>.

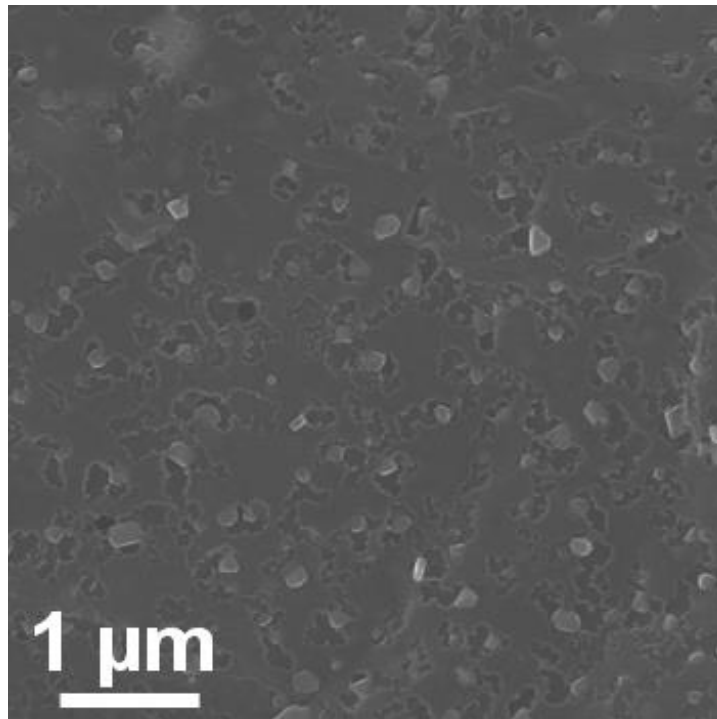

**Fig. S3** SEM image of PGF-2-Fe(NO<sub>3</sub>)<sub>3</sub>.

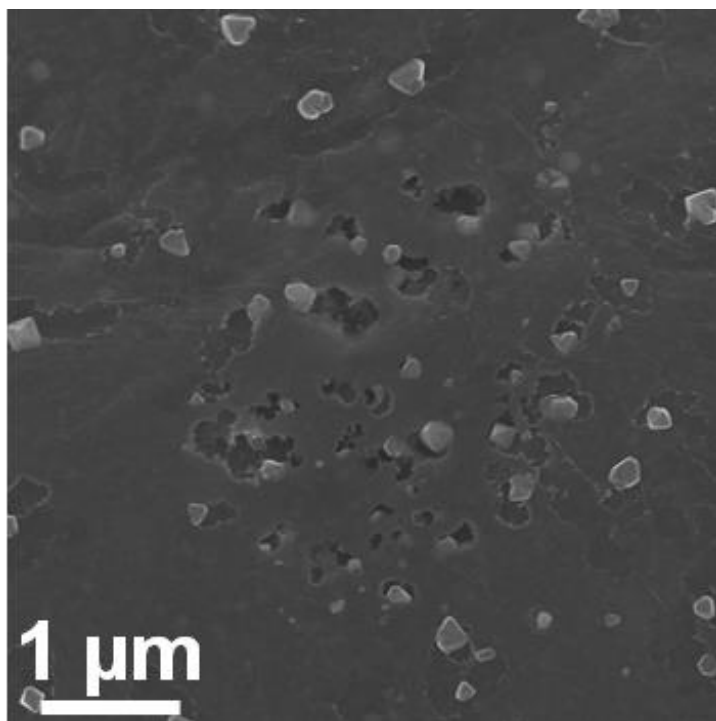

**Fig. S4** SEM image of PGF-3-Fe(NO<sub>3</sub>)<sub>3</sub>.

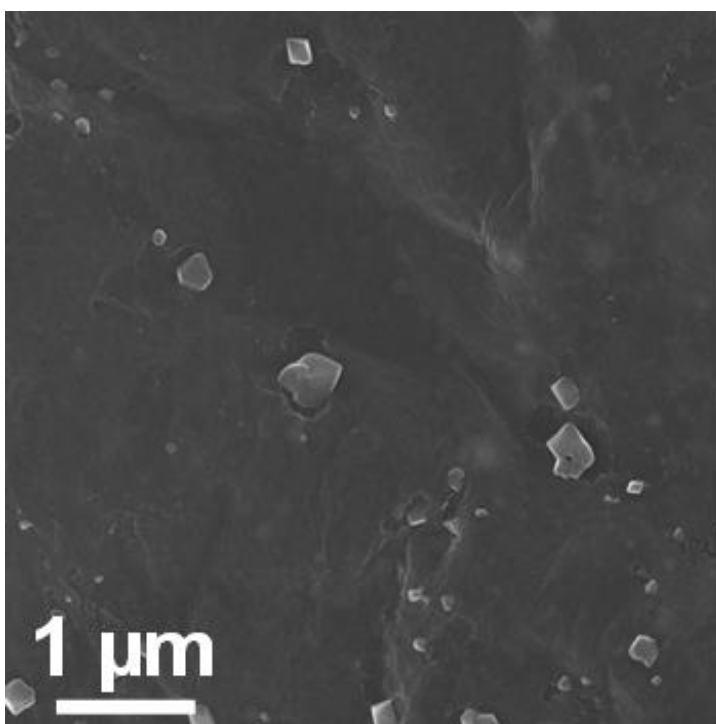

**Fig. S5** SEM image of PGF-4-Fe(NO<sub>3</sub>)<sub>3</sub>.

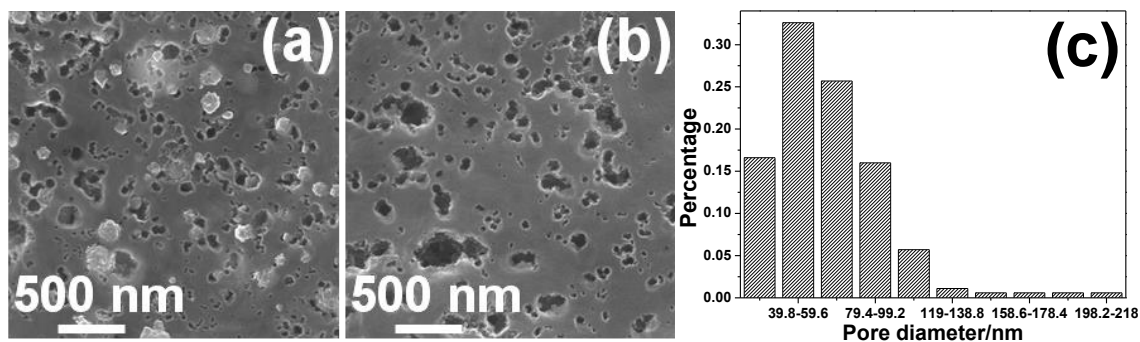

**Fig. S6** SEM images of (a) PGF-FeCl<sub>3</sub> and (b) corresponding PGF, (c) pore-size distribution of corresponding PGF.

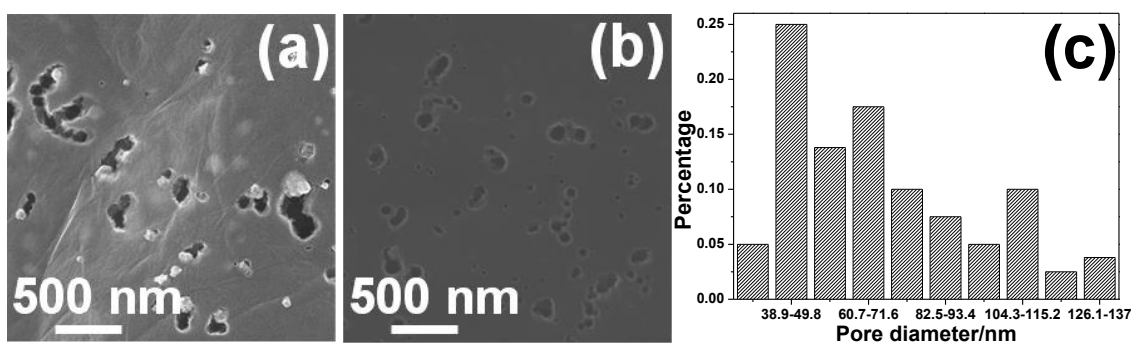

**Fig. S7** SEM images of (a) PGF-Co(NO<sub>3</sub>)<sub>2</sub> and (b) corresponding PGF, (c) pore-size distribution of corresponding PGF.

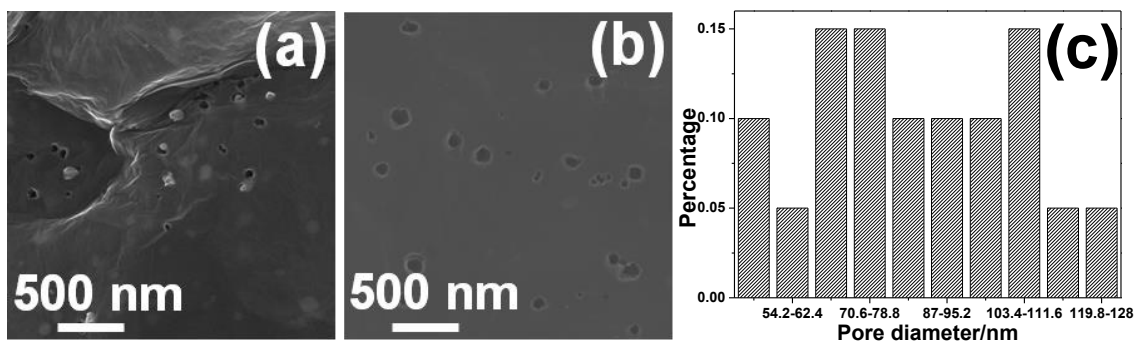

**Fig. S8** SEM images of (a) PGF-CoCl<sub>2</sub> and (b) corresponding PGF, (c) pore-size distribution of corresponding PGF.

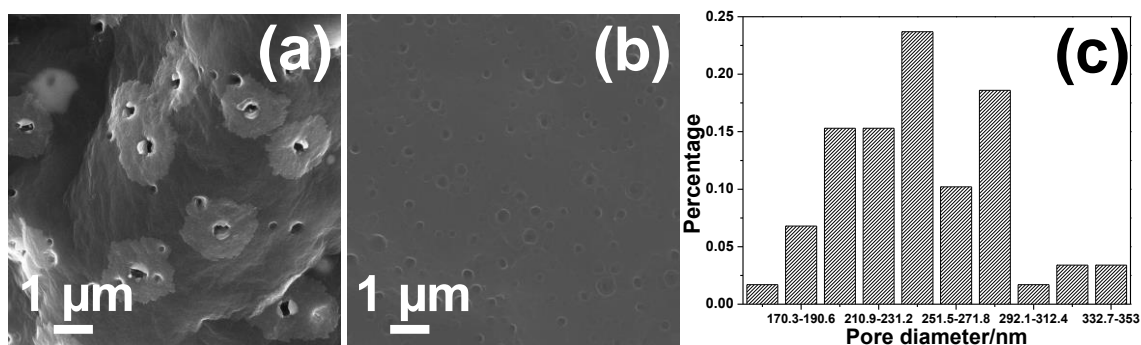

**Fig. S9** SEM images of (a) PGF-Cu(NO<sub>3</sub>)<sub>2</sub> and (b) corresponding PGF, (c) pore-size distribution of corresponding PGF.

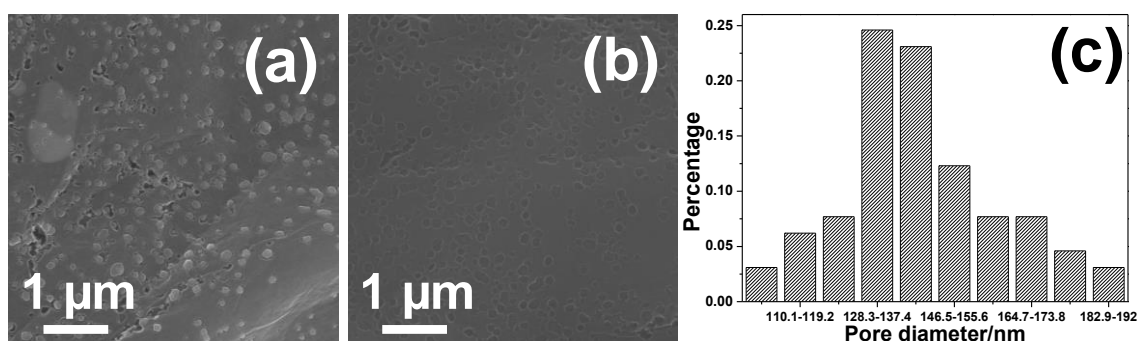

**Fig. S10** SEM images of (a) PGF-MnSO<sub>4</sub> and (b) corresponding PGF, (c) pore-size distribution of corresponding PGF.

**Table S1** The initial Coulombic efficiency and dynamical parameters of AC impedance spectra for GF, PGF-1, PGF-2, PGF-3, and PGF-4 as LIBs and SIBs.

|       | LIBs                 |                    |                     | SIBs                 |                    |                     |
|-------|----------------------|--------------------|---------------------|----------------------|--------------------|---------------------|
|       | Coulombic efficiency | R <sub>f</sub> (Ω) | R <sub>ct</sub> (Ω) | Coulombic efficiency | R <sub>f</sub> (Ω) | R <sub>ct</sub> (Ω) |
| GF    | 51 %                 | 26.95              | 38.58               | 33 %                 | 25.25              | 252.10              |
| PGF-1 | 35 %                 | 2.58               | 19.34               | 29 %                 | 14.29              | 184.40              |
| PGF-2 | 34 %                 | 18.51              | 24.97               | -                    | -                  | -                   |
| PGF-3 | 33 %                 | 22.21              | 32.35               | -                    | -                  | -                   |
| PGF-4 | 36 %                 | 19.21              | 36.37               | -                    | -                  | -                   |

**Table S2** The specific capacity value of porous graphene in previous literature and this paper.

| Materials<br>(PG=Porous graphene) | Current density<br>(Ag <sup>-1</sup> ) | Discharge specific capacity<br>(mAhg <sup>-1</sup> ) | Cycle<br>numbers |
|-----------------------------------|----------------------------------------|------------------------------------------------------|------------------|
| N-Doped PG <sup>1</sup>           | 5                                      | 450                                                  | 1500             |
| PG <sup>2</sup>                   | 5                                      | 560                                                  | 3000             |
| PG paper <sup>3</sup>             | 10                                     | ~75                                                  | 1000             |
| PG <sup>4</sup>                   | 20C                                    | 211                                                  | 100              |
| PG <sup>5</sup>                   | 20                                     | 199                                                  | 50               |
| PG <sup>6</sup>                   | 10                                     | 346.5                                                | 60               |
| N-S-Doped PG <sup>7</sup>         | 1                                      | 556                                                  | 50               |
| N-Doped PG <sup>8</sup>           | 10                                     | 210                                                  | 25               |
| PG paper <sup>9</sup>             | 2                                      | 420                                                  | 100              |
| PG <sup>10</sup>                  | 20                                     | 100                                                  | 10000            |
| <b>Our result: PGF-1</b>          | <b>10</b>                              | <b>971</b>                                           | <b>10000</b>     |
| <b>Our result: PGF-1</b>          | <b>30</b>                              | <b>298</b>                                           | <b>10000</b>     |
| <b>Our result: PGF-1</b>          | <b>50</b>                              | <b>163</b>                                           | <b>10000</b>     |

## References

- 1 X. Ma, G. Ning, C. Qi, C. Xu and J. Gao, *ACS Appl. Mater. Inter.*, 2014, **6**, 14415.
- 2 Z.-L. Wang, D. Xu, H.-G. Wang, Z. Wu and X.-B. Zhang, *ACS Nano*, 2013, **7**, 2422.
- 3 X. Zhao, C. M. Hayner, M. C. Kung and H. H. Kung, *ACS Nano*, 2011, **5**, 8739.
- 4 Z. Fan, J. Yan, G. Ning, T. Wei, L. Zhi and F. Wei, *Carbon*, 2013, **60**, 558.
- 5 H. Cao, X. Zhou, C. Zheng and Z. Liu, *Carbon*, 2015, **89**, 41.
- 6 J. Zhang, B. Guo, Y. Yang, W. Shen, Y. Wang, X. Zhou, H. Wu and S. Guo, *Carbon*, 2015, **84**, 469.
- 7 D. Sun, J. Yang and X. Yan, *Chem. Commun.*, 2015, **51**, 2134.

- 8 X. Jia, G. Zhang, T. Wang, X. Zhu, F. Yang, Y. Li, Y. Lu and F. Wei, *J. Mater. Chem. A*, 2015, **3**, 15738.
- 9 K. Shu, C. Wang, S. Li, C. Zhao, Y. Yang, H. Liu and G. Wallace, *J. Mater. Chem. A*, 2015, **3**, 4428.
- 10 D. Zhao, L. Wang, P. Yu, L. Zhao, C. Tian, W. Zhou, L. Zhang and H. Fu, *Nano Research*, 2015, **8**, 2998.
